# Supplementary material for: A molecular proximity sensor based on an engineered, dual-component guide RNA
Source: eLife. 2025 Feb 12;13:RP98110. doi: 10.7554/eLife.98110 (PMC11820115; doi:10.7554/eLife.98110)
Supplement: Figure 1—source data 1. [file elife-98110-fig1-data1.xlsx]

## Sheet: Figure 1d
Figure 1d. Editing efficiencies for prime editing (CTT insertion to HEK3 native genomic locus) using matching crRNA/petracrRNA pairs.
Condition	Efficiency	Replication
Design1-WT	14.3528	rep1
Design1-WT	16.5144	rep2
Design1-WT	15.6257	rep3
Design2	2.77484	rep1
Design2	2.54056	rep2
Design2	2.73593	rep3
Design3	0.284699	rep1
Design3	0.38217	rep2
Design3	0.290735	rep3
Design4	17.4119	rep1
Design4	16.9793	rep2
Design4	14.935	rep3
Design5	21.3391	rep1
Design5	24.4894	rep2
Design5	26.5211	rep3
Design5-flip	28.0672	rep1
Design5-flip	29.5829	rep2
Design5-flip	27.6068	rep3
eCTT	39.1055	rep1
eCTT	38.3253	rep2
eCTT	34.9817	rep3

## Sheet: Figure 1e
Figure 1e. Editing efficiencies for prime editing (CTT insertion to HEK3 native genomic locus) using mixed crRNA/petracrRNA pairs.
Condition	Efficiency	Replication
Design 5+4	2.3884	rep1
Design 4+5	0.829548	rep1
Design 1+4	2.47268	rep1
Design 4+1	1.21842	rep1
Design 4	16.8833	rep1
Design 5+2	3.30368	rep1
Design 5+3	1.40198	rep1
eCTT	40.6	rep1
Design 5+4	2.33061	rep2
Design 4+5	0.880638	rep2
Design 1+4	2.04575	rep2
Design 4+1	1.52201	rep2
Design 4	16.0333	rep2
Design 5+2	3.52087	rep2
Design 5+3	1.3365	rep2
eCTT	39.1827	rep2
Design 5+4	2.59775	rep3
Design 4+5	1.07503	rep3
Design 1+4	2.54877	rep3
Design 4+1	1.67654	rep3
Design 4	15.2081	rep3
Design 5+2	3.61749	rep3
Design 5+3	1.50665	rep3
eCTT	34.5798	rep3

## Sheet: Figure supplement 1c
Figure 1-figure supplement 1c. Testing the sgRNA:petRNA splitting strategy.
Condition	split	Efficiency	Replications
CTT	gsplit	11.4752	rep1
CTT	gsplit	11.9676	rep2
CTT	gsplit	12.0139	rep3
SLonly	pesplit	4.72458	rep1
SLonly	pesplit	7.65677	rep2
SLonly	pesplit	5.26033	rep3
D22A	pesplit	0.10021	rep1
D22A	pesplit	0.0349776	rep2
D22A	pesplit	0.176165	rep3
D17	pesplit	0.587719	rep1
D17	pesplit	0.418558	rep2
D17	pesplit	0.841377	rep3
D14	pesplit	0.0772299	rep1
D14	pesplit	0.12727	rep2
D14	pesplit	0.0138362	rep3
D13	pesplit	0.440095	rep1
D13	pesplit	0.431061	rep2
D13	pesplit	0.322701	rep3
D22B	pesplit	0.00514285	rep1
D22B	pesplit	0.00143374	rep2
D22B	pesplit	0.158141	rep3
D164A	pesplit	0.0103359	rep1
D164A	pesplit	0.0141705	rep2
D164A	pesplit	0.0120112	rep3
D164B	pesplit	0.0136179	rep1
D164B	pesplit	0.0190106	rep2
D164B	pesplit	0.00706483	rep3

## Sheet: Figure supplement 2c
Figure 1-figure supplement 2c. Testing the self-splicing ribozyme strategy.
Group	Efficiency	Reps
T1A	0.0984134	rep1
T1A	0.112885	rep2
T1A	0.0760716	rep3
T1D	0	rep1
T1D	0.00815761	rep2
T1D	0.000485637	rep3
T2A	0.592272	rep1
T2A	0.528485	rep2
T2A	0.47129	rep3
T2D	0	rep1
T2D	0.0266778	rep2
T2D	0	rep3
T3	0.248858	rep1
T3	0.0363352	rep2
T3	0.0576575	rep3
T4	0.15837	rep1
T4	0.241512	rep2
T4	0.30978	rep3
T5	0.0123312	rep1
T5	0.0155364	rep2
T5	0.0132887	rep3
T6	2.79076	rep1
T6	1.84514	rep2
T6	1.95693	rep3
