# Supplementary material for: A molecular proximity sensor based on an engineered, dual-component guide RNA
Source: eLife. 2025 Feb 12;13:RP98110. doi: 10.7554/eLife.98110 (PMC11820115; doi:10.7554/eLife.98110)
Supplement: Figure 2—source data 1. [file elife-98110-fig2-data1.xlsx]

## Sheet: Figure 2b,d
Figure 2b,d. Controlling genome editing with constitutive or chemically-induced protein-protein interactions.
Protein	Efficiency	NormEfficiency	Replications
eCTT	29.2405	99.6127	rep1
eCTT	29.6965	101.166	rep2
eCTT	29.1256	99.2211	rep3
MCPLN	15.4528	52.6426	rep1
MCPLN	15.7869	53.7808	rep2
MCPLN	14.2791	48.6442	rep3
GCN4	6.1251	34.4468	rep1
GCN4	6.02791	33.9002	rep2
GCN4	5.3422	30.0439	rep3
GCN1	8.14516	45.8074	rep1
GCN1	6.57354	36.9687	rep2
GCN1	6.43761	36.2043	rep3
NbALFA	6.49149	36.5074	rep1
NbALFA	6.60954	37.1712	rep2
NbALFA	5.75083	32.3419	rep3
GFPNLS	4.86914	16.5875	rep1
GFPNLS	5.1127	17.4173	rep2
GFPNLS	4.32907	14.7477	rep3
GFPnoNLS	3.27949	11.1721	rep1
GFPnoNLS	2.78984	9.50406	rep2
GFPnoNLS	2.61232	8.8993	rep3
eCTT	17.0743	96.0238	rep1
eCTT	18.3751	103.339	rep2
eCTT	17.8945	100.637	rep3
FillerGFP	2.66146	8.78462	rep1
FillerGFP	2.39996	7.92149	rep2
FillerGFP	2.0306	6.70235	rep3
FKBP_200	10.1558	57.1152	rep1
FKBP_200	11.096	62.4024	rep2
FKBP_200	9.85044	55.3976	rep3
FKBP_2	6.13301	34.4913	rep1
FKBP_2	6.62639	37.266	rep2
FKBP_2	6.73668	37.8863	rep3
FKBP_0p2	3.35491	18.8676	rep1
FKBP_0p2	3.13853	17.6507	rep2
FKBP_0p2	3.51296	19.7565	rep3
FKBP_0	2.9442	16.5578	rep1
FKBP_0	2.52113	14.1785	rep2
FKBP_0	2.48406	13.97	rep3
ABI_100	7.09178	39.8833	rep1
ABI_100	6.45399	36.2964	rep2
ABI_100	5.92303	33.3104	rep3
ABI_10	4.44957	25.0238	rep1
ABI_10	4.55766	25.6317	rep2
ABI_10	4.50638	25.3433	rep3
ABI_1	4.14184	23.2932	rep1
ABI_1	3.18944	17.937	rep2
ABI_1	3.61641	20.3382	rep3
ABI_0	2.69248	15.1422	rep1
ABI_0	2.2108	12.4333	rep2
ABI_0	2.28561	12.854	rep3

## Sheet: Figure supplement 1
Figure 2-figure supplement 1. Characterizing linkers for crRNA-MS2 and BoxB-petracrRNA.
Design	Protein	Edit_mean	Edit_sd
GCGC	GFP_filler	5.95714	1.61561
GCGC	splitGFP	21.784	3.38133
GCGUC	GFP_filler	6.35203	0.938077
GCGUC	splitGFP	18.3979	0.414412
GCGUAC	GFP_filler	10.3006	1.06156
GCGUAC	splitGFP	28.0171	0.403655
GCGUAGC	GFP_filler	4.50351	0.875818
GCGUAGC	splitGFP	11.2699	0.848155
GCGUAGCG	GFP_filler	25.8726	2.06995
GCGUAGCG	splitGFP	40.506	2.3533
GCGUAGCUG	GFP_filler	31.112	1.92695
GCGUAGCUG	splitGFP	46.483	1.4037
GCGUCAGCUG	GFP_filler	35.4038	1.33749
GCGUCAGCUG	splitGFP	53.3836	2.21767
GCUA	GFP_filler	1.27448	0.233355
GCUA	splitGFP	6.46681	0.450879
GAUA	GFP_filler	0.269642	0.0654433
GAUA	splitGFP	3.82152	0.996944
GAUAA	GFP_filler	0.337994	0.0611737
GAUAA	splitGFP	2.21418	0.138946
GUUA	GFP_filler	1.43895	0.304083
GUUA	splitGFP	4.77999	0.400161
GUUC	GFP_filler	1.55291	0.122463
GUUC	splitGFP	4.28216	0.138772
Design	Protein	NormEfficiency
GCGC	splitGFP	27.1174
GCGC	splitGFP	26.0133
GCGC	splitGFP	22.7985
GCGC	GFP_filler	8.78462
GCGC	GFP_filler	7.92149
GCGC	GFP_filler	6.70235
GCGUC	splitGFP	17.9321
GCGUC	splitGFP	18.7258
GCGUC	splitGFP	18.5359
GCGUC	GFP_filler	6.70807
GCGUC	GFP_filler	7.05997
GCGUC	GFP_filler	5.28806
GCGUAC	splitGFP	27.5825
GCGUAC	splitGFP	28.3802
GCGUAC	splitGFP	28.0885
GCGUAC	GFP_filler	11.4312
GCGUAC	GFP_filler	9.3252
GCGUAC	GFP_filler	10.1455
GCGUAGC	splitGFP	10.764
GCGUAGC	splitGFP	10.7966
GCGUAGC	splitGFP	12.249
GCGUAGC	GFP_filler	5.3319
GCGUAGC	GFP_filler	3.58693
GCGUAGC	GFP_filler	4.59169
GCGUAGCG	splitGFP	41.0876
GCGUAGCG	splitGFP	37.9165
GCGUAGCG	splitGFP	42.514
GCGUAGCG	GFP_filler	27.6865
GCGUAGCG	GFP_filler	23.6177
GCGUAGCG	GFP_filler	26.3135
GCGUAGCUG	splitGFP	47.4888
GCGUAGCUG	splitGFP	47.0808
GCGUAGCUG	splitGFP	44.8794
GCGUAGCUG	GFP_filler	28.8961
GCGUAGCUG	GFP_filler	32.3949
GCGUAGCUG	GFP_filler	32.0449
GCGUCAGCUG	splitGFP	51.2158
GCGUCAGCUG	splitGFP	53.2868
GCGUCAGCUG	splitGFP	55.648
GCGUCAGCUG	GFP_filler	36.8905
GCGUCAGCUG	GFP_filler	35.0225
GCGUCAGCUG	GFP_filler	34.2983
GCUA	splitGFP	5.95257
GCUA	splitGFP	6.65347
GCUA	splitGFP	6.79438
GCUA	GFP_filler	1.18178
GCUA	GFP_filler	1.10173
GCUA	GFP_filler	1.53995
GAUA	splitGFP	3.22374
GAUA	splitGFP	4.97241
GAUA	splitGFP	3.26843
GAUA	GFP_filler	0.324164
GAUA	GFP_filler	0.287694
GAUA	GFP_filler	0.197067
GAUAA	splitGFP	2.22871
GAUAA	splitGFP	2.34528
GAUAA	splitGFP	2.06853
GAUAA	GFP_filler	0.40227
GAUAA	GFP_filler	0.280486
GAUAA	GFP_filler	0.331227
GUUA	splitGFP	4.34166
GUUA	splitGFP	4.87256
GUUA	splitGFP	5.12576
GUUA	GFP_filler	1.12263
GUUA	GFP_filler	1.7291
GUUA	GFP_filler	1.46513
GUUC	splitGFP	4.31865
GUUC	splitGFP	4.39905
GUUC	splitGFP	4.12879
GUUC	GFP_filler	1.64054
GUUC	GFP_filler	1.41298
GUUC	GFP_filler	1.60522
