# Supplementary material for: A molecular proximity sensor based on an engineered, dual-component guide RNA
Source: eLife. 2025 Feb 12;13:RP98110. doi: 10.7554/eLife.98110 (PMC11820115; doi:10.7554/eLife.98110)
Supplement: Figure 3—source data 1. [file elife-98110-fig3-data1.xlsx]

## Sheet: Figure 3
Figure 3. Testing P3 editing strategy in the context of base editing.
Condition	Efficiency	Replications
ABE-P3_GCGC-GFP	12.081	rep1
ABE-P3_GCGC-GFP	11.672	rep2
ABE-P3_GCGC-GFP	10.438	rep3
ABE-P3_GCGC-LM	24.869	rep1
ABE-P3_GCGC-LM	24.592	rep2
ABE-P3_GCGC-LM	22.099	rep3
ABE-HEK3_sgRNA-GFP	18.862	rep1
ABE-HEK3_sgRNA-GFP	18.785	rep2
ABE-HEK3_sgRNA-GFP	17.675	rep3
ABE-HEK3_sgRNA-LM	17.639	rep1
ABE-HEK3_sgRNA-LM	16.915	rep2
ABE-HEK3_sgRNA-LM	13.093	rep3
CBE2-P3_GCGC-GFP	5.068	rep1
CBE2-P3_GCGC-GFP	7.095	rep2
CBE2-P3_GCGC-GFP	5.528	rep3
CBE2-P3_GCGC-LM	8.527	rep1
CBE2-P3_GCGC-LM	7.789	rep2
CBE2-P3_GCGC-LM	8.27	rep3
CBE2-HEK3_sgRNA-GFP	4.423	rep1
CBE2-HEK3_sgRNA-GFP	4.812	rep2
CBE2-HEK3_sgRNA-GFP	3.388	rep3
CBE2-HEK3_sgRNA-LM	4.003	rep1
CBE2-HEK3_sgRNA-LM	4.551	rep2
CBE2-HEK3_sgRNA-LM	3.604	rep3
CBEmax-P3_GCGC-GFP	4.594	rep1
CBEmax-P3_GCGC-GFP	5.897	rep2
CBEmax-P3_GCGC-GFP	5.038	rep3
CBEmax-P3_GCGC-LM	17.465	rep1
CBEmax-P3_GCGC-LM	18.972	rep2
CBEmax-P3_GCGC-LM	18.149	rep3
CBEmax-HEK3_sgRNA-GFP	20.723	rep1
CBEmax-HEK3_sgRNA-GFP	19.968	rep2
CBEmax-HEK3_sgRNA-GFP	17.317	rep3
CBEmax-HEK3_sgRNA-LM	19.349	rep1
CBEmax-HEK3_sgRNA-LM	19.326	rep2
CBEmax-HEK3_sgRNA-LM	16.642	rep3
