# Supplementary material for: A molecular proximity sensor based on an engineered, dual-component guide RNA
Source: eLife. 2025 Feb 12;13:RP98110. doi: 10.7554/eLife.98110 (PMC11820115; doi:10.7554/eLife.98110)
Supplement: Figure 4—source data 1. [file elife-98110-fig4-data1.xlsx]

## Sheet: Figure 4
Figure 4. Combining ADAR-based RNA sensors with P3 editing.
Condition	NormEfficiency
RadarGFP_ddADAR_IL6mRNA_LP	32.674
RadarGFP_ddADAR_IL6mRNA_LP	34.1777
RadarGFP_ddADAR_IL6mRNA_LP	35.2572
RadarGFP_ddADAR_IL6mRNA	4.87603
RadarGFP_ddADAR_IL6mRNA	6.02142
RadarGFP_ddADAR_IL6mRNA	5.61493
RadarLP_ddADAR	8.42275
RadarLP_ddADAR	8.23215
RadarLP_ddADAR	7.90196
RadarLP_ddADAR_IL6mRNA	11.2098
RadarLP_ddADAR_IL6mRNA	12.3899
RadarLP_ddADAR_IL6mRNA	11.2259
Condition	Edit_sd	Edit_mean
RadarGFP_ddADAR_IL6mRNA_LP	1.29739	34.0363
RadarGFP_ddADAR_IL6mRNA	0.580678	5.50413
RadarLP_ddADAR	0.263493	8.18562
RadarLP_ddADAR_IL6mRNA	0.676754	11.6085
